# Supplementary material
Source: publisher site journal article supplement (https://www.dovepress.com/get_supplementary_file.php?f=469999.docx)
Supplement: Supplementary file 1 [file get_supplementary_file.php]

**Supplement 1. Key Informant Interview Guide**

**Key Informant Interview Guide – Instructions**

*Note: The protocol below outlines the topics that will be covered during the interviews and provides examples of the types of open-ended questions that you will ask. However, we will follow the lead of participants and will ask additional questions if necessary to fully discuss a particular topic or pursue other topics if they are raised in the interview as being important.* ***(The added questions should be done at the end of the interview.)***

| 1. Welcome | Thank you for agreeing to meet with me. My name is ____ and I will be doing today’s interview. I am a ____ and I work for ____.  **Introduction**  Good morning/afternoon. We are conducting a study designed to adapt a group intervention for chronic pain to be specific and relevant to patients with sickle cell disease. We are also investigating how experiences of racism and stigma influence chronic pain. We are interviewing you given your very unique expertise and experience as a patient with sickle cell disease. Your views and suggestions will be extremely useful and will provide insight to researchers that will help us develop new and innovative treatments for sickle cell disease. The information you give will be held in the highest confidence. Your name is not required. You will be required to provide your demographic details as well as provide consent to participate by completing some forms. Do you agree?  A. Yes B. No |
| --- | --- |
| 2. Ground Rules | Before we begin, I would like to review a few ground rules for the discussion.   1. I will ask you questions and then give you a chance to give your opinions. 2. We’re interested in your opinions and whatever you have to say is fine with us. There are no right or wrong answers. We are just asking for your opinions and suggestions. We are here to learn from you. 3. You may choose not to answer any question you do not wish to. 4. We will treat your answers as confidential. We are not going to ask for anything that could reveal or suggest your identity. 5. I will audio record the interview today because we don’t want to miss any of your suggestions. [NOTE: ALL PARTICIPANTS SHOULD HAVE ALREADY AGREED TO THE TAPE RECORDING ON WRITTEN INFORMED CONSENT. IF A PARTICIPANT DECIDES THAT’S/HE DOES NOT WANT TO BE TAPED AND WANTS TO LEAVE, S/HE SHOULD STILL BE GIVEN THE INCENTIVE]. 6. We will not include your name or any other information that could suggest your identity in any reports we write. 7. Finally, this interview will last for about 1 hour.   **PLEASE ADMINISTER THE INFORMED CONSENT FORM NOW**  Do you have any questions before we start? |

**REQUEST TO TURN ON RECORDER AT THIS POINT IN THE INTERVIEW**

**Key Informant Interview Guide – Sociodemographic Questions**

Serial Number ____________________________ (This # should match the number on the tracking form)

1. Age?
2. Gender
   1. Male
   2. Female
   3. Other
3. How would you describe your race and ethnicity?
4. What is your current marital status?
   1. Never married
   2. Married
   3. Living with partner
   4. Separated or Divorced
   5. Widowed
5. What type of sickle cell disease do you have?
   1. SS
   2. SC
   3. SB-0thalassemia
   4. SB+ thalassemia
   5. Unknown
6. How many people live within your household?
7. What is your annual household income?
   1. $0-$24,999
   2. $25,000-$49,999
   3. $50,000-$74,999
   4. $75,000-$99,999
   5. $100,000-$149,999
   6. $150,000 or more

**Key Informant Interview Guide – Interview Questions**

*(Note: Probes for each question if you feel you need more information---“Tell me more please” or “Please explain what you mean by your answer.” Otherwise, please do not add additional questions during the following questions, but if you feel you need additional information, add your questions at the end of all of the following questions.)*

1. What are your thoughts on nonpharmacologic pain treatment? These treatments are anything that do not use medications. Other than medicines, what kind of treatments have you tried to use or have people recommended that you use?
2. Please review the modules from the current pain group curriculum. How important are each of these modules to you?
   1. On a scale of 1-5 with 1 being “very important” and 5 being “not important at all” please rate the importance of each to you. Explain why you gave each rating.
   2. For each module, tell me about how you think you might use the information.
3. What other information would you want to hear about?
4. How will you know this group is effective or not effective for you and why?
5. Should we have a module on acute pain? Hospital experiences? Navigating acute vs. chronic pain? Transition to adult health care system? Any other information to include?
6. What are the most memorable, both positive and negative, conversations that you have had about race? Please describe the content and the persons involved- who, what, when, where, how? Or split into 2 questions- memorable positive and memorable negative
7. Describe any conversations (or experiences---positive or negative) you have had with health professionals related to race. Please describe the content and the persons involved- who what, when, where, how? Split into 2 questions positive and negative conversations with health care professionals
8. Do you think experiences with racism and sickle cell disease stigma affect your health? Does this affect your pain? Why or why not? Some people think about this as sickle cell disease related stigma, meaning XXX?
9. How, if at all, do you think we can have a conversation around race in sickle cell disease? Who should be a part of this conversation?
10. Is there anything else related to either pain treatments or race that you want to discuss?

**Supplement 2. Draft Curriculum for Chronic Pain Program**

| **Chronic Pain in Sickle Cell Disease**  **A Pathway to Better Management & Coping**  **Who:** For individuals struggling with chronic pain as a result of sickle cell disease. 8-12 attendees / session, individuals will be referred through Sickle Cell Clinic  **What:** 6 week intensive-outpatient program (1 day/week for 6 weeks or 3 days/week for 2 weeks), 90-minute peer-lead group therapy sessions, co-facilitated by a psychologist  **Where:** Virtual with video/audio (i.e., Zoom)  **When:** Time/date to be determined  **Why:** Chronic pain is inevitable when living with sickle cell disease. Millions of dollars in work up and interventions may put a band-aid on their pain but is not really helping the patient function better day to day, aim to better improve patient’s quality of life both emotionally and physically  **How:** Encouraging the idea of skills vs. pills**—**a structured curriculum to learn and practice a variety of cognitive-behavioral, acceptance and commitment and dialectical-behavioral therapy skills to learn to better cope and function with their pain. Aim to learn to live with our pain vs. feeling like a victim of it. Pain is inevitable; suffering does not have to be.  **Objective:** After identifying their individual goals and values, at the end of 6 weeks, participants will be walking away with a binder of skills/toolbox of tools to live a life worth living in better control of their pain.  **Session 1:** **What is chronic pain?** Define chronic pain, identify both individual and group goals for the course. Start building our toolbox of skills with guided deep breathing exercises. Will review related relaxation techniques and discuss proper sleep hygiene. Nutrition and rest is how we fuel our bodies and if not eating or sleeping well, it is bound to take a toll on our mood and experience of pain.  **Session 2: Why do I experience pain?** Discussion of pain in relationship to physical disease as well as additional factors that affect pain like emotional responses, behaviors, and social supports. Review the gateway theory. We will practice breathing exercises, guided imagery, and progressive muscle relaxation. Begin to think about how to manage severe pain days because often the anticipation of pain keeps us from living our best selves.  **Session 3: Getting a grip on your thoughts.** Discuss the relationship between emotions and pain. We will discuss how thinking traps can affect pain and learn about the ABC model (activating event, beliefs, and consequences). We will teach restructuring and de-fusion techniques. Learn to use our wise mind- “I feel this, I know this, and so I will do this…” the middle path create joy.  **Session 4: How can I relax? I’m in pain!** Discuss how chronic pain is affected by stress and anger management. We will explore self-care activities like yoga, meditation, massages, and distraction techniques. We will discuss positive self- talk to change negative thinking and practice mindfulness. If we put ourselves back in the driver’s seat, the pain will no longer be in control.  **Session 5: What’s important to me?** Discuss the relationship between pain and your personal values. We will help you identify what is important to you and illustrate how that can be used to improve our perception of pain. In doing so it’s important to learn good pacing skills and how to get moving on days when we just feel like we can’t.  **Session 6: That’s a wrap!** We will review all the skills we put in the “tool kit” over the last 5 weeks. We will discuss what was learned, how to implement it and then reflect back on it to see how we can make each day better than the last. Feedback will, of course, be welcomed as we are a new program and looking to improve it to best meet your needs |
| --- |

**Supplement 3. Participant Survey**

Your participation in this survey is completely voluntary. By clicking yes and advancing to the next question, you are giving your consent to participate. You can stop taking the survey at anytime if you wish not to continue. Upon completion of this survey and a telephone interview by the research team, you will be mailed a $20 gift card. Your answers are anonymous. The research team will only be able to see if you completed the survey, not what your answers were. If the results of these surveys becomes published, all information will be presented in groups so that it cannot be linked to you. If you have any questions please contact the coordinator for the study, Alyssa Young at (xxx) xxx-xxxx. You may also contact the ChristianaCare Institutional Review Board at (302) 623-4983.

| ◌ | I understand |
| --- | --- |

**Everyone experiences painful situations at some point in their lives. Such experiences may include headaches, tooth pain, joint or muscle pain. People are often exposed to situations that may cause pain such as illness, injury, dental procedures or surgery.**

**We are interested in the types of thoughts that you have when you are in pain. Listed below are thirteen statements describing different thoughts and feelings that may be associated with pain. Please indicate to which degree you have the following thoughts and feelings when you are experiencing pain.**

|  | **Not at all** | **To a slight degree** | **To a moderate degree** | **To a great degree** | **All the time** |
| --- | --- | --- | --- | --- | --- |
| I worry all the time about whether the pain will end. | ◌ | ◌ | ◌ | ◌ | ◌ |
| I feel I can't go on. | ◌ | ◌ | ◌ | ◌ | ◌ |
| It's terrible and I think it's never going to get any better. | ◌ | ◌ | ◌ | ◌ | ◌ |
| It's awful and I feel that it overwhelms me. | ◌ | ◌ | ◌ | ◌ | ◌ |
| I feel I can't stand it anymore. | ◌ | ◌ | ◌ | ◌ | ◌ |
| I become afraid that the pain will get worse. | ◌ | ◌ | ◌ | ◌ | ◌ |
| I keep thinking of other painful events | ◌ | ◌ | ◌ | ◌ | ◌ |
| I anxiously want the pain to go away | ◌ | ◌ | ◌ | ◌ | ◌ |
| I can't seem to keep it out of my mind | ◌ | ◌ | ◌ | ◌ | ◌ |
| I keep thinking about how much it hurts | ◌ | ◌ | ◌ | ◌ | ◌ |
| I keep thinking about how badly I want the pain to stop | ◌ | ◌ | ◌ | ◌ | ◌ |
| There's nothing I can do to reduce the intensity of the pain | ◌ | ◌ | ◌ | ◌ | ◌ |
| I wonder whether something serious may happen | ◌ | ◌ | ◌ | ◌ | ◌ |

**Please rate how often the following experiences happen during your interaction with the medical profession.**

|  | **Never** | **Rarely** | **Sometimes** | **Most of the time** | **Always** |
| --- | --- | --- | --- | --- | --- |
| You are treated with less courtesy than other people. | ◌ | ◌ | ◌ | ◌ | ◌ |
| You are treated with less respect than other people. | ◌ | ◌ | ◌ | ◌ | ◌ |
| You receive poorer service than others. | ◌ | ◌ | ◌ | ◌ | ◌ |
| A doctor or nurse acts as if he or she thinks you are not smart. | ◌ | ◌ | ◌ | ◌ | ◌ |
| A doctor or nurse acts as if he or she is afraid of you. | ◌ | ◌ | ◌ | ◌ | ◌ |
| A doctor or nurse acts as if he or she is better than you. | ◌ | ◌ | ◌ | ◌ | ◌ |
| You feel like a doctor or nurse is not listening to what you are saying. | ◌ | ◌ | ◌ | ◌ | ◌ |

**For each statement below, please indicate your agreement or disagreement. Do so by filling in**

**the blank in front of each item with the appropriate number from the following rating scale:**

|  | **1. Strongly**  **disagree** | **2** | **3** | **4. Neutral** | **5** | **6** | **7. Strongly**  **agree** |
| --- | --- | --- | --- | --- | --- | --- | --- |
| Whenever I feel positive emotions, people can easily see exactly what I am feeling | ◌ | ◌ | ◌ | ◌ | ◌ | ◌ | ◌ |
| I sometimes cry during sad movies. | ◌ | ◌ | ◌ | ◌ | ◌ | ◌ | ◌ |
| People often do not know what I am feeling. | ◌ | ◌ | ◌ | ◌ | ◌ | ◌ | ◌ |
| I laugh out loud when someone tells me a joke that I think is funny. | ◌ | ◌ | ◌ | ◌ | ◌ | ◌ | ◌ |
| It is difficult for me to hide my fear. | ◌ | ◌ | ◌ | ◌ | ◌ | ◌ | ◌ |
| When I'm happy, my body reacts strongly to emotional situations. | ◌ | ◌ | ◌ | ◌ | ◌ | ◌ | ◌ |
| I've learned it is better to suppress my anger than to show it. | ◌ | ◌ | ◌ | ◌ | ◌ | ◌ | ◌ |
| No matter how nervous or upset I am, I tend to keep a calm exterior | ◌ | ◌ | ◌ | ◌ | ◌ | ◌ | ◌ |
| I am an emotionally expressive person. | ◌ | ◌ | ◌ | ◌ | ◌ | ◌ | ◌ |
| I have strong emotions. | ◌ | ◌ | ◌ | ◌ | ◌ | ◌ | ◌ |
| I am sometimes unable to hide my feelings even though I would like to. | ◌ | ◌ | ◌ | ◌ | ◌ | ◌ | ◌ |
| Whenever I feel negative emotions, people can easily see exactly what I am feeling. | ◌ | ◌ | ◌ | ◌ | ◌ | ◌ | ◌ |
| There have been times when I have not been able to stop crying even though I tried to stop. | ◌ | ◌ | ◌ | ◌ | ◌ | ◌ | ◌ |
| I experience my emotions very strongly. | ◌ | ◌ | ◌ | ◌ | ◌ | ◌ | ◌ |
| What I'm feeling is written all over my face. | ◌ | ◌ | ◌ | ◌ | ◌ | ◌ | ◌ |

**If you feel you have been treated unfairly, do you usually:**

**(please select the best response)**

| ◌ | Accept it as a fact of life |
| --- | --- |
| ◌ | Try to do something about it |

**If you have been treated unfairly, do you usually:**

**(please select the best response)**

| ◌ | Talk to other people about it |
| --- | --- |
| ◌ | No Keep it to yourself |

**Have you ever experiences discrimination, been prevented from doing something, or been hassled or made to feel inferior in any of the following situations because of your race, ethnicity, or color? If so, how many times did this happen?**

|  | **Not at all** | **Once** | **Two or three times** | **Four or more times** |
| --- | --- | --- | --- | --- |
| At school | ◌ | ◌ | ◌ | ◌ |
| Getting hired or getting a job | ◌ | ◌ | ◌ | ◌ |
| At work | ◌ | ◌ | ◌ | ◌ |
| Getting housing | ◌ | ◌ | ◌ | ◌ |
| Getting medical care | ◌ | ◌ | ◌ | ◌ |
| Getting service in a store or restaurant | ◌ | ◌ | ◌ | ◌ |
| On the street or in a public setting | ◌ | ◌ | ◌ | ◌ |
| From the police or in the courts | ◌ | ◌ | ◌ | ◌ |

|  | **Most of the time** | **Some of the time** | **Rarely or never** |
| --- | --- | --- | --- |
| When you were a child or teenager (up to age 18), how much did you worry about people in your racial/ethnic group experiencing unfair treatment because of their race, ethnicity, or color? | ◌ | ◌ | ◌ |
| When you were a child or teenager (up to age 18), how much did you worry about yourself experiencing unfair treatment because of your race, ethnicity, or color? | ◌ | ◌ | ◌ |
| In the last year, how much did you worry about people in your racial/ethnic group experiencing unfair treatment because of their race, ethnicity, or color? | ◌ | ◌ | ◌ |
| In the last year, how much did you worry about yourself experiencing unfair treatment because of your race, ethnicity, or color? | ◌ | ◌ | ◌ |

**For this section, choose the number that best represents how you feel.**

|  | **Never** | **Rarely** | **Sometimes** | **Often** |
| --- | --- | --- | --- | --- |
| How often do you feel that racial/ethnic groups who are not white, such as African Americans and Latinos, are discriminated against? | ◌ | ◌ | ◌ | ◌ |
| How often do you feel that you, personally, have been discriminated against because of your race, ethnicity, or color? | ◌ | ◌ | ◌ | ◌ |

**Have you ever filed a formal complaint because of racial discrimination?**

| ◌ | Yes |
| --- | --- |
| ◌ | No |

**In the following questions, we are interested in the way other people have treated you or your beliefs about how other people have treated you. If any of the following has ever happened to you, what do you think was the main reason for this experience?**

|  | **This has never happened** | **Your ancestry or national origins** | **Your gender** | **Your race** | **Your age** | **Your religion** | **Your height or weight** | **Your shade of skin color** | **Your sexual orientation** | **Your education or income level** | **A physical disability** | **Other** |
| --- | --- | --- | --- | --- | --- | --- | --- | --- | --- | --- | --- | --- |
| At any time in your life, have you ever been unfairly fired? | ◌ | ◌ | ◌ | ◌ | ◌ | ◌ | ◌ | ◌ | ◌ | ◌ | ◌ | ◌ |
| For unfair reasons, have you ever not been hired for a job? | ◌ | ◌ | ◌ | ◌ | ◌ | ◌ | ◌ | ◌ | ◌ | ◌ | ◌ | ◌ |
| Have you ever been unfairly denied for a promotion? | ◌ | ◌ | ◌ | ◌ | ◌ | ◌ | ◌ | ◌ | ◌ | ◌ | ◌ | ◌ |
| Have you ever been unfairly stopped, searched, questioned, physically threatened or abused by the police? | ◌ | ◌ | ◌ | ◌ | ◌ | ◌ | ◌ | ◌ | ◌ | ◌ | ◌ | ◌ |
| Have you ever been unfairly discouraged by a teacher or advisor from continuing your education? | ◌ | ◌ | ◌ | ◌ | ◌ | ◌ | ◌ | ◌ | ◌ | ◌ | ◌ | ◌ |
| Have you ever been unfairly prevented from moving into a neighborhood because the landlord or realtor refused to sell or rent you a house or apartment? | ◌ | ◌ | ◌ | ◌ | ◌ | ◌ | ◌ | ◌ | ◌ | ◌ | ◌ | ◌ |
| Have you ever moved into a neighborhood where neighbors made life difficult for you or your family? | ◌ | ◌ | ◌ | ◌ | ◌ | ◌ | ◌ | ◌ | ◌ | ◌ | ◌ | ◌ |
| Have you ever been unfairly denied a bank loan? | ◌ | ◌ | ◌ | ◌ | ◌ | ◌ | ◌ | ◌ | ◌ | ◌ | ◌ | ◌ |
| Have you ever received service from someone such as a plumber or car mechanic that was worse than what other people get? | ◌ | ◌ | ◌ | ◌ | ◌ | ◌ | ◌ | ◌ | ◌ | ◌ | ◌ | ◌ |

**In your day to day life, how often have any of the following things happened to you?**

|  | **Four or more times** | **Two or three times** | **Once** | **Never** |
| --- | --- | --- | --- | --- |
| You have been treated with less courtesy than other people | ◌ | ◌ | ◌ | ◌ |
| You have been treated with less respect than other people | ◌ | ◌ | ◌ | ◌ |
| You have received poorer service than other people at restaurants or stores | ◌ | ◌ | ◌ | ◌ |
| People have acted as if they think you are not smart | ◌ | ◌ | ◌ | ◌ |
| People have acted as if they are afraid of you | ◌ | ◌ | ◌ | ◌ |
| People have acted as if they think you are being dishonest | ◌ | ◌ | ◌ | ◌ |
| People have acted as if they're better than you are | ◌ | ◌ | ◌ | ◌ |
| You have been called names or insulted | ◌ | ◌ | ◌ | ◌ |
| You have been threatened or harassed | ◌ | ◌ | ◌ | ◌ |
| You have been followed around in stores | ◌ | ◌ | ◌ | ◌ |

**You indicated that you have experienced at least one of the scenarios in the previous section. What do you think was the main reason for this/these experience(s)?**

| ◌ | Your ancestry or national origins |
| --- | --- |
| ◌ | Your gender |
| ◌ | Your race |
| ◌ | Your age |
| ◌ | Your religion |
| ◌ | Your height or weight |
| ◌ | Your shade of skin color |
| ◌ | Your sexual orientation |
| ◌ | Your education or income level |
| ◌ | A physical disability |
| ◌ | Other |

**You indicated that you experienced at least one of the scenarios mentioned in the previous section, how did you respond to this/these experience(s)? Please mark if you did each of the following:**

|  | **Yes** | **No** |
| --- | --- | --- |
| Tried to do something about it | ◌ | ◌ |
| Accepted it as a fact of life | ◌ | ◌ |
| Worked harder to prove them wrong | ◌ | ◌ |
| Realized that you brought it on yourself | ◌ | ◌ |
| Talked to someone about how you were feeling | ◌ | ◌ |
| Expressed anger or got mad | ◌ | ◌ |
| Prayed about the situation | ◌ | ◌ |

**Please select the response that most aligns with your level of agreement with the following statements regarding your doctors:**

|  | **Strongly**  **disagree** | **Disagree** | **Neutral** | **Agree** | **Strongly Agree** |
| --- | --- | --- | --- | --- | --- |
| Your doctor will do whatever it takes to get you all the care you need. | ◌ | ◌ | ◌ | ◌ | ◌ |
| Sometimes your doctor cares more about what is convenient for him/her than about your medical needs.  Your doctor's medical skills are not as good as they should be. | ◌ | ◌ | ◌ | ◌ | ◌ |
| Your doctor is extremely thorough and careful. | ◌ | ◌ | ◌ | ◌ | ◌ |
| You completely trust your doctor's decisions about which medical treatments are best for you. | ◌ | ◌ | ◌ | ◌ | ◌ |
| Your doctor is completely honest in telling you about all of the different treatment options available for your condition. | ◌ | ◌ | ◌ | ◌ | ◌ |
| Your doctor only thinks about what is best for you. | ◌ | ◌ | ◌ | ◌ | ◌ |
| Sometimes your doctor does not pay full attention to what you are trying to tell him/her. | ◌ | ◌ | ◌ | ◌ | ◌ |
| You have no worries about putting your life in your doctor's hands. | ◌ | ◌ | ◌ | ◌ | ◌ |
| All in all, you have complete trust in your doctor. | ◌ | ◌ | ◌ | ◌ | ◌ |

**Please select the response that most aligns with your level of agreement with the following statements regarding your health insurance company if you have health insurance:**

|  | **Strongly**  **disagree** | **Disagree** | **Neutral** | **Agree** | **Strongly Agree** |
| --- | --- | --- | --- | --- | --- |
| My health insurer cares more about saving money than about getting you the treatment you need. | ◌ | ◌ | ◌ | ◌ | ◌ |
| You feel like you need to double check everything your health insurer does. | ◌ | ◌ | ◌ | ◌ | ◌ |
| You believe your health insurer will pay for everything it is supposed to, even really expensive treatments. | ◌ | ◌ | ◌ | ◌ | ◌ |
| If you have a question, you think your health insurer will give you a straight answer. | ◌ | ◌ | ◌ | ◌ | ◌ |
| All in all, you have complete trust in your health insurer. | ◌ | ◌ | ◌ | ◌ | ◌ |

**Supplement 4. Complete Participant Survey Responses**

| **Pain Catastrophizing Scale (PCS) (5-point Likert scale)** | **N=12** |
| --- | --- |
| *Worry all the time about whether the pain will end, N (%)* |  |
| Not at all (0) | To a slight degree (1) | 3 (25.0) |
| To a moderate degree (2) | 3 (25.0) |
| To a great degree (3) | All the time (4) | 6 (50.0) |
| *I feel I can’t go on, N (%)* |  |
| Not at all (0) | To a slight degree (1) | 7 (58.3) |
| To a moderate degree (2) | 3 (25.0) |
| To a great degree (3) | All the time (4) | 2 (16.7) |
| *It’s terrible and I think it’s never going to get any better, N (%)* |  |
| Not at all (0) | To a slight degree (1) | 7 (58.3) |
| To a moderate degree (2) | 4 (33.3) |
| To a great degree (3) | All the time (4) | 1 (8.3) |
| *It’s awful and I feel that it overwhelms me, N (%)* |  |
| Not at all (0) | To a slight degree (1) | 5 (41.7) |
| To a moderate degree (2) | 4 (33.3) |
| To a great degree (3) | All the time (4) | 3 (25.0) |
| *I feel I can’t stand it anymore, N (%)* |  |
| Not at all (0) | To a slight degree (1) | 5 (41.7) |
| To a moderate degree (2) | 4 (33.3) |
| To a great degree (3) | All the time (4) | 3 (25.0) |
| *I become afraid that the pain will get worse, N (%)* |  |
| Not at all (0) | To a slight degree (1) | 2 (16.7) |
| To a moderate degree (2) | 6 (50.0) |
| To a great degree (3) | All the time (4) | 4 (33.3) |
| *I keep thinking of other painful events, N (%)* |  |
| Not at all (0) | To a slight degree (1) | 8 (66.7) |
| To a moderate degree (2) | 3 (25.0) |
| To a great degree (3) | All the time (4) | 1 (8.3) |
| *I anxiously want the pain to go away, N (%)* |  |
| Not at all (0) | To a slight degree (1) | 0 |
| To a moderate degree (2) | 0 |
| To a great degree (3) | All the time (4) | 12 (100) |
| *I can't seem to keep it out of my mind, N (%)* |  |
| Not at all (0) | To a slight degree (1) | 7 (58.3) |
| To a moderate degree (2) | 3 (25.0) |
| To a great degree (3) | All the time (4) | 2 (16.7) |
| *I keep thinking about how much it hurts, N (%)* |  |
| Not at all (0) | To a slight degree (1) | 5 (41.7) |
| To a moderate degree (2) | 4 (33.3) |
| To a great degree (3) | All the time (4) | 3 (25.0) |
| *I keep thinking about how badly I want the pain to stop, N (%)* |  |
| Not at all (0) | To a slight degree (1) | 4 (33.3) |
| To a moderate degree (2) | 2 (16.7) |
| To a great degree (3) | All the time (4) | 6 (50.0) |
| *There's nothing I can do to reduce the intensity of the pain, N (%)* |  |
| Not at all (0) | To a slight degree (1) | 5 (41.7) |
| To a moderate degree (2) | 4 (33.3) |
| To a great degree (3) | All the time (4) | 3 (25.0) |
| *I wonder whether something serious may happen, N (%)* |  |
| Not at all (0) | To a slight degree (1) | 0 |
| To a moderate degree (2) | 3 (25.0) |
| To a great degree (3) | All the time (4) | 9 (75.0) |
| **PCS rumination sub-score (sum of items 8, 9, 10, 11), mean (SD) [score range 0-16]** | **9.1 (3.5)** |
| **PCS magnification sub-score (sum of items 6, 7, 13), mean (SD) [score range 0-12]** | **6.2 (2.1)** |
| **PCS helplessness sub-score (sum of items 1, 2, 4, 5, 12), mean (SD) [score range 0-24]** | **10.5 (5.1)** |
| **PCS overall score (sum of all 13 items), mean (SD) [score range 0-52]** | **25.8 (8.5)** |

| **Discrimination in Medical Settings (DMS) (5-point Likert scale)** | **N=12** |
| --- | --- |
| *You are treated with less courtesy than other people, N (%)* |  |
| Never (0) | Rarely (1) | 7 (58.3) |
| Sometimes (2) | 3 (25.0) |
| Most of the time (3) | Always (4) | 2 (16.7) |
| *You are treated with less respect than other people, N (%)* |  |
| Never (0) | Rarely (1) | 6 (50.0) |
| Sometimes (2) | 4 (33.3) |
| Most of the time (3) | Always (4) | 2 (16.7) |
| *You receive poorer service than others, N (%)* |  |
| Never (0) | Rarely (1) | 4 (33.3) |
| Sometimes (2) | 5 (41.7) |
| Most of the time (3) | Always (4) | 3 (25.0) |
| *A doctor or nurse acts as if he or she thinks you are not smart, N (%)* |  |
| Never (0) | Rarely (1) | 8 (66.7) |
| Sometimes (2) | 1 (8.3) |
| Most of the time (3) | Always (4) | 3 (25.0) |
| *A doctor or nurse acts as if he or she is afraid of you, N (%)* |  |
| Never (0) | Rarely (1) | 10 (83.3) |
| Sometimes (2) | 2 (16.7) |
| Most of the time (3) | Always (4) | 0 |
| *A doctor or nurse acts as if he or she is better than you, N (%)* |  |
| Never (0) | Rarely (1) | 8 (66.7) |
| Sometimes (2) | 2 (16.7) |
| Most of the time (3) | Always (4) | 2 (16.7) |
| *You feel like a doctor or nurse is not listening to what you are saying, N (%)* |  |
| Never (0) | Rarely (1) | 5 (41.7) |
| Sometimes (2) | 5 (41.7) |
| Most of the time (3) | Always (4) | 2 (16.7) |
| **DMS overall score, mean (SD) [score range 0-4]** | **1.4 (1.2)** |

| **Berkeley Expressivity Questionnaire (BEQ) (7-point Likert scale)** | **N=12** |
| --- | --- |
| *Whenever I feel positive emotions, people can easily see exactly what I am feeling, N (%)* |  |
| (1) Strongly disagree | (2) | 1 (8.3) |
| (3) | (4) Neutral | (5) | 5 (41.7) |
| (6) | (7) Strongly agree | 6 (50.0) |
| *I sometimes cry during sad movies, N (%)* |  |
| (1) Strongly disagree | (2) | 4 (33.3) |
| (3) | (4) Neutral | (5) | 5 (41.7) |
| (6) | (7) Strongly agree | 3 (25.0) |
| *People often do not know what I am feelinga, N (%)* |  |
| (7) Strongly disagree | (6) | 5 (41.7) |
| (5) | (4) Neutral | (3) | 5 (41.7) |
| (2) | (1) Strongly agree | 2 (16.7) |
| *I laugh out loud when someone tells me a joke that I think is funny, N (%)* |  |
| (1) Strongly disagree | (2) | 0 |
| (3) | (4) Neutral | (5) | 4 (33.3) |
| (6) | (7) Strongly agree | 8 (66.67) |
| *It is difficult for me to hide my fear, N (%)* |  |
| (1) Strongly disagree | (2) | 5 (41.7) |
| (3) | (4) Neutral | (5) | 5 (41.7) |
| (6) | (7) Strongly agree | 2 (16.7) |
| *When I'm happy, my feeling show, N (%)* |  |
| (1) Strongly disagree | (2) | 2 (16.7) |
| (3) | (4) Neutral | (5) | 4 (33.3) |
| (6) | (7) Strongly agree | 6 (50.0) |
| *My body reacts strongly to emotional situations, N (%)* |  |
| (1) Strongly disagree | (2) | 1 (8.3) |
| (3) | (4) Neutral | (5) | 5 (41.7) |
| (6) | (7) Strongly agree | 6 (50.0) |
| *I've learned it is better to suppress my anger than to show ita, N (%)* |  |
| (7) Strongly disagree | (6) | 2 (16.7) |
| (5) | (4) Neutral | (3) | 6 (50.0) |
| (2) | (1) Strongly agree | 4 (33.3) |
| *No matter how nervous or upset I am, I tend to keep a calm exteriora, N (%)* |  |
| (7) Strongly disagree | (6) | 5 (41.7) |
| (5) | (4) Neutral | (3) | 4 (33.3) |
| (2) | (1) Strongly agree | 3 (25.0) |
| *I am an emotionally expressive person, N (%)* |  |
| (1) Strongly disagree | (2) | 1 (8.3) |
| (3) | (4) Neutral | (5) | 9 (75.0) |
| (6) | (7) Strongly agree | 2 (16.7) |
| *I have strong emotions, N (%)* |  |
| (1) Strongly disagree | (2) | 1 (8.3) |
| (3) | (4) Neutral | (5) | 5 (41.7) |
| (6) | (7) Strongly agree | 6 (50.0) |
| *I am sometimes unable to hide my feelings even though I would like to, N (%)* |  |
| (1) Strongly disagree | (2) | 3 (25.0) |
| (3) | (4) Neutral | (5) | 4 (33.3) |
| (6) | (7) Strongly agree | 5 (41.7) |
| *Whenever I feel negative emotions, people can easily see exactly what I am feeling, N (%)* |  |
| (1) Strongly disagree | (2) | 3 (25.0) |
| (3) | (4) Neutral | (5) | 6 (50.0) |
| (6) | (7) Strongly agree | 3 (25.0) |
| *There have been times when I have not been able to stop crying even though I tried to stop, N (%)* |  |
| (1) Strongly disagree | (2) | 6 (50.0) |
| (3) | (4) Neutral | (5) | 3 (25.0) |
| (6) | (7) Strongly agree | 3 (25.0) |
| *I experience my emotions very strongly, N (%)* |  |
| (1) Strongly disagree | (2) | 3 (25.0) |
| (3) | (4) Neutral | (5) | 5 (41.7) |
| (6) | (7) Strongly agree | 4 (33.3) |
| *What I'm feeling is written all over my face, N (%)* |  |
| (1) Strongly disagree | (2) | 3 (25.0) |
| (3) | (4) Neutral | (5) | 4 (33.3) |
| (6) | (7) Strongly agree | 5 (41.7) |
| **BEQ negative expressivity sub-score, mean (SD) of items 3r, 5, 8r, 9r, 13, 16 [sub-score range 1-7]** | **3.8 (2.2)** |
| **BEQ positive expressivity sub-score, mean (SD) of items 1, 4, 6, 10 [sub-score range 1-7]** | **5.1 (1.9)** |
| **BEQ impulse strength sub-score, mean (SD) of items 2, 7, 11, 12, 14, 15 [sub-score range 1-7]** | **4.5 (2.2)** |
| **BEQ overall score, mean (SD) of negative expressivity sub-score, positive expressivity sub-score, impulse strength sub-score [overall score range 1-7]** | **4.4 (2.1)** |

aReverse coded

| **Everyday Discrimination Scale (EDS)** | **N=12** |
| --- | --- |
| ***Experience of discrimination (EOD)***  ***This next section is going to ask about how you and others like you are treated, and how you typically respond*** |  |
| ***EOD Response to unfair treatment*** | **N (%)** |
| *If you feel you have been treated unfairly, do you usually:* |  |
| Accept it as a fact of life | 6 (50.0) |
| Try to do something about it | 6 (50.0) |
| *If you have been treated unfairly, do you usually:* |  |
| Talk to other people about it | 7 (58.3) |
| Keep it to yourself | 5 (41.7) |
| ***EOD Discrimination*** | **N (%)** |
| *Have you ever experiences discrimination, been prevented from doing something, or been hassled or made to feel inferior in any of the following situations because of your race, ethnicity, or color? If so, how many times did this happen?* |  |
| *School* |  |
| Not at all (0) | 7 (58.3) |
| Once (1) | Two or three times (2.5) | 2 (16.7) |
| Four or more times (5) | 3 (25.0) |
| *Getting hired or getting a job* |  |
| Not at all (0) | 7 (58.3) |
| Once (1) | Two or three times (2.5) | 3 (25.0) |
| Four or more times (5) | 2 (16.7) |
| *At work* |  |
| Not at all (0) | 7 (58.3) |
| Once (1) | Two or three times (2.5) | 3 (25.0) |
| Four or more times (5) | 2 (16.7) |
| *Getting housing* |  |
| Not at all (0) | 7 (58.3) |
| Once (1) | Two or three times (2.5) | 3 (25.0) |
| Four or more times (5) | 2 (16.7) |
| *Getting medical care* |  |
| Not at all (0) | 6 (50.0) |
| Once (1) | Two or three times (2.5) | 2 (16.7) |
| Four or more times (5) | 4 (33.3) |
| *Getting service in a store or restaurant* |  |
| Not at all (0) | 6 (50.0) |
| Once (1) | Two or three times (2.5) | 2 (16.7) |
| Four or more times (5) | 4 (33.3) |
| *On the street or in a public setting* |  |
| Not at all (0) | 5 (41.7) |
| Once (1) | Two or three times (2.5) | 5 (41.7 |
| Four or more times (5) | 2 (16.7) |
| *From the police or in the courts* |  |
| Not at all (0) | 9 (75.0) |
| Once (1) | Two or three times (2.5) | 2 (16.7) |
| Four or more times (5) | 1 (8.3) |
| ***EDS Worry (3-point Likert scale)*** | **N (%)** |
| *When you were a child or teenager (up to age 18), how much did you worry about people in your racial/ethnic group experiencing unfair treatment because of their race, ethnicity, or color?* |  |
| Most of the time (1) | 3 (25.0) |
| Some of the time (2) | 5 (41.7) |
| Rarely or never (3) | 4 (33.3) |
| *When you were a child or teenager (up to age 18), how much did you worry about yourself experiencing unfair treatment because of your race, ethnicity or color?* |  |
| Most of the time (1) | 3 (25.0) |
| Some of the time (2) | 4 (33.3) |
| Rarely or never (3) | 5 (41.7) |
| *In the last year, how much did you worry about people in your racial/ethnic group experiencing unfair treatment because of their race, ethnicity or color?* |  |
| Most of the time (1) | 7 (58.3) |
| Some of the time (2) | 2 (16.7) |
| Rarely or never (3) | 3 (25.0) |
| *In the last year how much did you worry about yourself experiencing unfair treatment because of your race, ethnicity, or color?* |  |
| Most of the time (1) | 8 (67.7) |
| Some of the time (2) | 4 (33.3) |
| Rarely or never (3) | 0 |
| ***EDS Global (4-point Likert scale)*** | **N (%)** |
| *How often do you feel that racial/ethnic groups who are not white, such as African Americans and Latinos, are discriminated against?* |  |
| 1, Never | 0 |
| 2, Rarely | 3, Sometimes | 1 (8.3) |
| 4, Often | 11 (91.7) |
| *How often do you feel that you, personally, have been discriminated against because of your race, ethnicity, or color?* |  |
| 1, Never | 2 (16.7) |
| 2, Rarely | 3, Sometimes | 7 (58.3) |
| 4, Often | 3 (25.0) |
| ***EDS Filed Complaint*** | **N (%)** |
| *Have you ever filed a formal complaint because of racial discrimination?* |  |
| Yes | 0 |
| No | 12 (100.0) |

| **Everyday Discrimination Scale (EDS) continued**  ***Williams Questions – Major discrimination (N=12)*** | | | | | | | | | | | | |
| --- | --- | --- | --- | --- | --- | --- | --- | --- | --- | --- | --- | --- |
| ***In the following questions, we are interested in the way other people have treated you or your beliefs about how other people have treated you. If any of the following has ever happened to you, what do you think was the main reason for this experience?*** | | | | | | | | | | | | |
|  | **Never**  **N (%)** | **Ancestry/ national origins**  **N (%)** | **Gender**  **N (%)** | **Race**  **N (%)** | **Age**  **N (%)** | **Religion**  **N (%)** | **Height/ weight**  **N (%)** | **Shade of skin color**  **N (%)** | **Sexual orientation**  **N (%)** | **Education/ income level**  **N (%)** | **Physical Disability**  **N (%)** | **Other**  **N (%)** |
| Fired from job | 6 (50.0) | 1 (8.3) | 0 | 0 | 0 | 0 | 0 | 0 | 1 (8.3) | 0 | 2 (16.7) | 2 (16.7) |
| Not hired for job | 6 (50.0) | 0 | 0 | 0 | 0 | 1 (8.3) | 0 | 1 (8.3) | 0 | 0 | 2 (16.7) | 2 (16.7) |
| Denied promotion | 7 (58.3) | 0 | 0 | 0 | 0 | 1 (8.3) | 0 | 1 (8.3) | 0 | 0 | 1 (8.3) | 2 (16.7) |
| Stopped, searched, questioned, physically threatened, or abused by police | 7 (58.3) | 1 (8.3) | 0 | 0 | 1 (8.3) | 0 | 0 | 2 (16.7) | 0 | 0 | 0 | 1 (8.3) |
| Discouraged by teacher or advisor from continuing education | 5 (41.7) | 0 | 0 | 0 | 1 (8.3) | 0 | 0 | 1 (8.3) | 0 | 1 (8.3) | 2 (16.7) | 2 (16.7) |
| Prevented from moving into neighborhood because the landlord or realtor refused to sell or rent house or apartment | 9 (75.0) | 0 | 0 | 0 | 1 (8.3) | 0 | 0 | 1 (8.3) | 0 | 0 | 0 | 1 (8.3) |
| Moved into neighborhood where neighbors made life difficult | 7 (58.3) | 0 | 0 | 1 (8.3) | 1 (8.3) | 1 (8.3) | 0 | 1 (8.3) | 0 | 0 | 0 | 1 (8.3) |
| Denied bank loan | 8 (66.7) | 0 | 0 | 0 | 0 | 0 | 0 | 1 (8.3) | 0 | 0 | 1 (8.3) | 2 (16.7) |
| Received service from someone such as plumber or mechanic that was worse than what other people get | 9 (75.0) | 0 | 0 | 0 | 0 | 0 | 0 | 0 | 1 (8.3) | 0 | 0 | 2 (16.7) |

| **Everyday Discrimination Scale (EDS) continued (4-point Likert scale)**  **Williams Questions – Day-to-day unfair treatment** | **N=12** |
| --- | --- |
| ***In your day-to-day life, how often have any of the following things happened to you?*** | **N (%)** |
| *You have been treated with less courtesy than other people* |  |
| 1, Four or more times | 2, Two or three times | 3, Once | 9 (75.0) |
| 4, Never | 3 (25.0) |
| *You have been treated with less respect than other people* |  |
| 1, Four or more times | 2, Two or three times | 3, Once | 9 (75.0) |
| 4, Never | 3 (25.0) |
| *You have received poorer service than other people at restaurants or stores* |  |
| 1, Four or more times | 2, Two or three times | 3, Once | 7 (58.3) |
| 4, Never | 5 (41.7) |
| *People have acted as if they think you are not smart* |  |
| 1, Four or more times | 2, Two or three times | 3, Once | 8 (66.7) |
| 4, Never | 4 (33.3) |
| *People have acted as if they are afraid of you* |  |
| 1, Four or more times | 2, Two or three times | 3, Once | 6 (50.0) |
| 4, Never | 6 (50.0) |
| *People have acted as if they think you are being dishonest* |  |
| 1, Four or more times | 2, Two or three times | 3, Once | 7 (58.3) |
| 4, Never | 5 (41.7) |
| *People have acted as if they're better than you are* |  |
| 1, Four or more times | 2, Two or three times | 3, Once | 9 (75.0) |
| 4, Never | 3 (25.0) |
| *You have been called names or insulted* |  |
| 1, Four or more times | 2, Two or three times | 3, Once | 8 (66.7) |
| 4, Never | 4 (33.3) |
| *You have been threatened or harassed* |  |
| 1, Four or more times | 2, Two or three times | 3, Once | 6 (50.0) |
| 4, Never | 6 (50.0) |
| *You have been followed around in stores* |  |
| 1, Four or more times | 2, Two or three times | 3, Once | 8 (66.7) |
| 4, Never | 4 (33.3) |

| **Everyday Discrimination Scale (EDS) continued**  ***Williams Questions –* Day-to-day unfair treatment** | **N=12** |
| --- | --- |
| ***You indicated that you have experienced at least one of the scenarios in the previous section. What do you think was the main reason for this/these experience(s)?*** | **N (%)** |
| Your ancestry or national origins | 1 (8.3) |
| Your gender | 0 |
| Your race | 4 (33.3) |
| Your age | 1 (8.3) |
| Your religion | 0 |
| Your height or weight | 0 |
| Your shade of skin color | 2 (16.7) |
| Your sexual orientation | 0 |
| Your education or income level | 0 |
| A physical disability | 3 (25.0) |
| Other | 1 (8.3) |

| **Everyday Discrimination Scale (EDS) continued**  ***Williams Questions – Response to unfair treatment*** | **N=12** |
| --- | --- |
| ***You indicated that you experienced at least one of the scenarios mentioned in the previous section, how did you respond to this/these experience(s)? Please mark if you did each of the following:*** | **N (%)** |
| *Tried to do something about it* |  |
| Yes | 5 (41.7) |
| No | 7 (58.3) |

| **Wake Forest Physician Trust Scale (WFPT) (5-point Likert scale)** | **N=12** |
| --- | --- |
| ***Please select the response that most aligns with your level of agreement with the following statements regarding your doctors:*** |  |
| *Your doctor will do whatever it takes to get you all the care you need, N (%)* |  |
| 1, Strongly disagree | 2, Disagree | 11 (91.7) |
| 3, Neutral | 1 (8.3) |
| 4, Agree | 5, Strongly Agree | 0 |
| *Sometimes your doctor cares more about what is convenient for him/her than about your medical needs, N (%)* |  |
| 1, Strongly disagree | 2, Disagree | 8 (66.7) |
| 3, Neutral | 1 (8.3) |
| 4, Agree | 5, Strongly Agree | 3 (25.0) |
| *Your doctor's medical skills are not as good as they should be, N (%)* |  |
| 1, Strongly disagree | 2, Disagree | 10 (83.3) |
| 3, Neutral | 1 (8.3) |
| 4, Agree | 5, Strongly Agree | 1 (8.3) |
| *Your doctor is extremely thorough and careful, N (%)* |  |
| 1, Strongly disagree | 2, Disagree | 0 |
| 3, Neutral | 1 (8.3) |
| 4, Agree | 5, Strongly Agree | 11 (91.7) |
| *You completely trust your doctor's decisions about which medical treatments are best for you, N (%)* |  |
| 1, Strongly disagree | 2, Disagree | 0 |
| 3, Neutral | 3 (25.0) |
| 4, Agree | 5, Strongly Agree | 9 (75.0) |
| *Your doctor is completely honest in telling you about all of the different treatment options available for your condition, N (%)* |  |
| 1, Strongly disagree | 2, Disagree | 0 |
| 3, Neutral | 1 (8.3) |
| 4, Agree | 5, Strongly Agree | 11 (91.7) |
| *Your doctor only thinks about what is best for you, N (%)* |  |
| 1, Strongly disagree | 2, Disagree | 0 |
| 3, Neutral | 1 (8.3) |
| 4, Agree | 5, Strongly Agree | 11 (91.7) |
| *Sometimes your doctor does not pay full attention to what you are trying to tell him/her, N (%)* |  |
| 1, Strongly disagree | 2, Disagree | 9 (75.0) |
| 3, Neutral | 1 (8.3) |
| 4, Agree | 5, Strongly Agree | 2 (16.7) |
| *You have no worries about putting your life in your doctor's hands, N (%)* |  |
| 1, Strongly disagree | 2, Disagree | 0 |
| 3, Neutral | 3 (25.0) |
| 4, Agree | 5, Strongly Agree | 9 (75.0) |
| *All in all, you have complete trust in your doctor, N (%)* |  |
| 1, Strongly disagree | 2, Disagree | 0 |
| 3, Neutral | 2 (16.7) |
| 4, Agree | 5, Strongly Agree | 10 (83.3) |
| **Overall Score, mean (SD) [range 10-50]** | **37.1 (3.2)** |

| **Interpersonal Trust Scale (ITS): Patient trust in the medical profession and health insurers** | **N=12** |
| --- | --- |
| ***Please select the response that most aligns with your level of agreement with the following statements regarding doctors in general:*** | **N (%)** |
| *Sometimes doctors care more about what is convenient for them than about their patient's medical need* a*, N (%)* |  |
| 1, Strongly disagree | 2, Disagree | 3 (25.0) |
| 3, Neutral | 2 (16.7) |
| 4, Agree | 5, Strongly Agree | 7 (58.3) |
| *Doctors are extremely thorough and careful, N (%)* |  |
| 5, Strongly disagree | 4, Disagree | 0 |
| 3, Neutral | 4 (33.3) |
| 2, Agree | 1, Strongly Agree | 8 (66.7) |
| *You completely trust doctors' decisions about which medical treatments are best, N (%)* |  |
| 5, Strongly disagree | 4, Disagree | 8 (66.7) |
| 3, Neutral | 3 (25.0) |
| 2, Agree | 1, Strongly Agree | 1 (8.3) |
| *A doctor would never mislead you about anything, N (%)* |  |
| 5, Strongly disagree | 4, Disagree | 5 (41.7) |
| 3, Neutral | 4 (33.3) |
| 2, Agree | 1, Strongly Agree | 3 (25.0) |
| *All in all, you trust doctors completely, N (%)* |  |
| 5, Strongly disagree | 4, Disagree | 6 (50.0) |
| 3, Neutral | 4 (33.3) |
| 2, Agree | 1, Strongly Agree | 2 (16.7) |
| **Overall score, mean (SD) [range 5-25]** | **18.0 (3.3)** |

aReverse coded

| **Interpersonal Trust Scale (ITS): Patient trust in the medical profession and health insurers continued** | **N=12** |
| --- | --- |
| ***Please select the response that most aligns with your level of agreement with the following statements regarding your health insurance company if you have health insurance:*** | **N (%)** |
| *My health insurer cares more about saving money than about getting you the treatment you need*a*, N (%)* |  |
| 0, I do not have health insurance | 0 |
| 1, Strongly disagree | 2, Disagree | 4 (33.3) |
| 3, Neutral | 4 (33.3) |
| 4, Agree | 5, Strongly Agree | 4 (33.3) |
| *You feel like you need to double check everything your health insurer does*a*, N (%)* |  |
| 0, I do not have health insurance | 0 |
| 1, Strongly disagree | 2, Disagree | 1 (8.3) |
| 3, Neutral | 5 (41.7) |
| 4, Agree | 5, Strongly Agree | 6 (50.0) |
| *You believe your health insurer will pay for everything it is supposed to, even really expensive treatments, N (%)* |  |
| 0, I do not have health insurance | 0 |
| 5, Strongly disagree | 4, Disagree | 4 (33.3) |
| 3, Neutral | 4 (33.3) |
| 2, Agree | 1, Strongly Agree | 4 (33.3) |
| *If you have a question, you think your health insurer will give you a straight answer, N (%)* |  |
| 0, I do not have health insurance | 0 |
| 5, Strongly disagree | 4, Disagree | 6 (50.0) |
| 3, Neutral | 5 (41.7) |
| 2, Agree | 1, Strongly Agree | 1 (8.3) |
| *All in all, you have complete trust in your health insurer, N (%)* |  |
| 0, I do not have health insurance | 1 (8.3) |
| 5, Strongly disagree | 4, Disagree | 5 (41.7) |
| 3, Neutral | 3 (25.0) |
| 2, Agree | 1, Strongly Agree | 3 (25.0) |
| **Overall score, mean (SD) [range 5-25]** | **16.0 (2.7)** |

aReverse coded
